# Supplementary material for: Error compensated MOF-based ReRAM array for encrypted logical operations
Source: Royal Society of Chemistry journal article supplement (doi:10.1039/d4dt02880e), 2024-11-22
Supplement: d4dt02880e1.pdf [file d4dt02880e1.pdf]

## Supporting Information

### **Error compensated MOF-based ReRAM array for encrypted logical operations**

*Semyon V. Bachinin,<sup>\*a</sup> Sergey S. Rzjevskii,<sup>a</sup> Ivan Sergeev,<sup>a</sup> Svyatoslav A. Povarov,<sup>a</sup> Alena N. Kulakova,<sup>a</sup> Anastasia Lubimova,<sup>a</sup> Varvara Haritonova,<sup>a</sup> Valentine A. Milichko<sup>\*b</sup>*

<sup>a</sup>. School of Physics and Engineering, ITMO University, Saint Petersburg, 197101, Russia

<sup>b</sup>. Institut Jean Lamour, Universit de Lorraine, UMR CNRS 7198, 54011, Nancy, France.

E-mail: [semen.bachinin@metalab.ifmo.ru](mailto:semen.bachinin@metalab.ifmo.ru); [valentin.milichko@univ-lorraine.fr](mailto:valentin.milichko@univ-lorraine.fr)

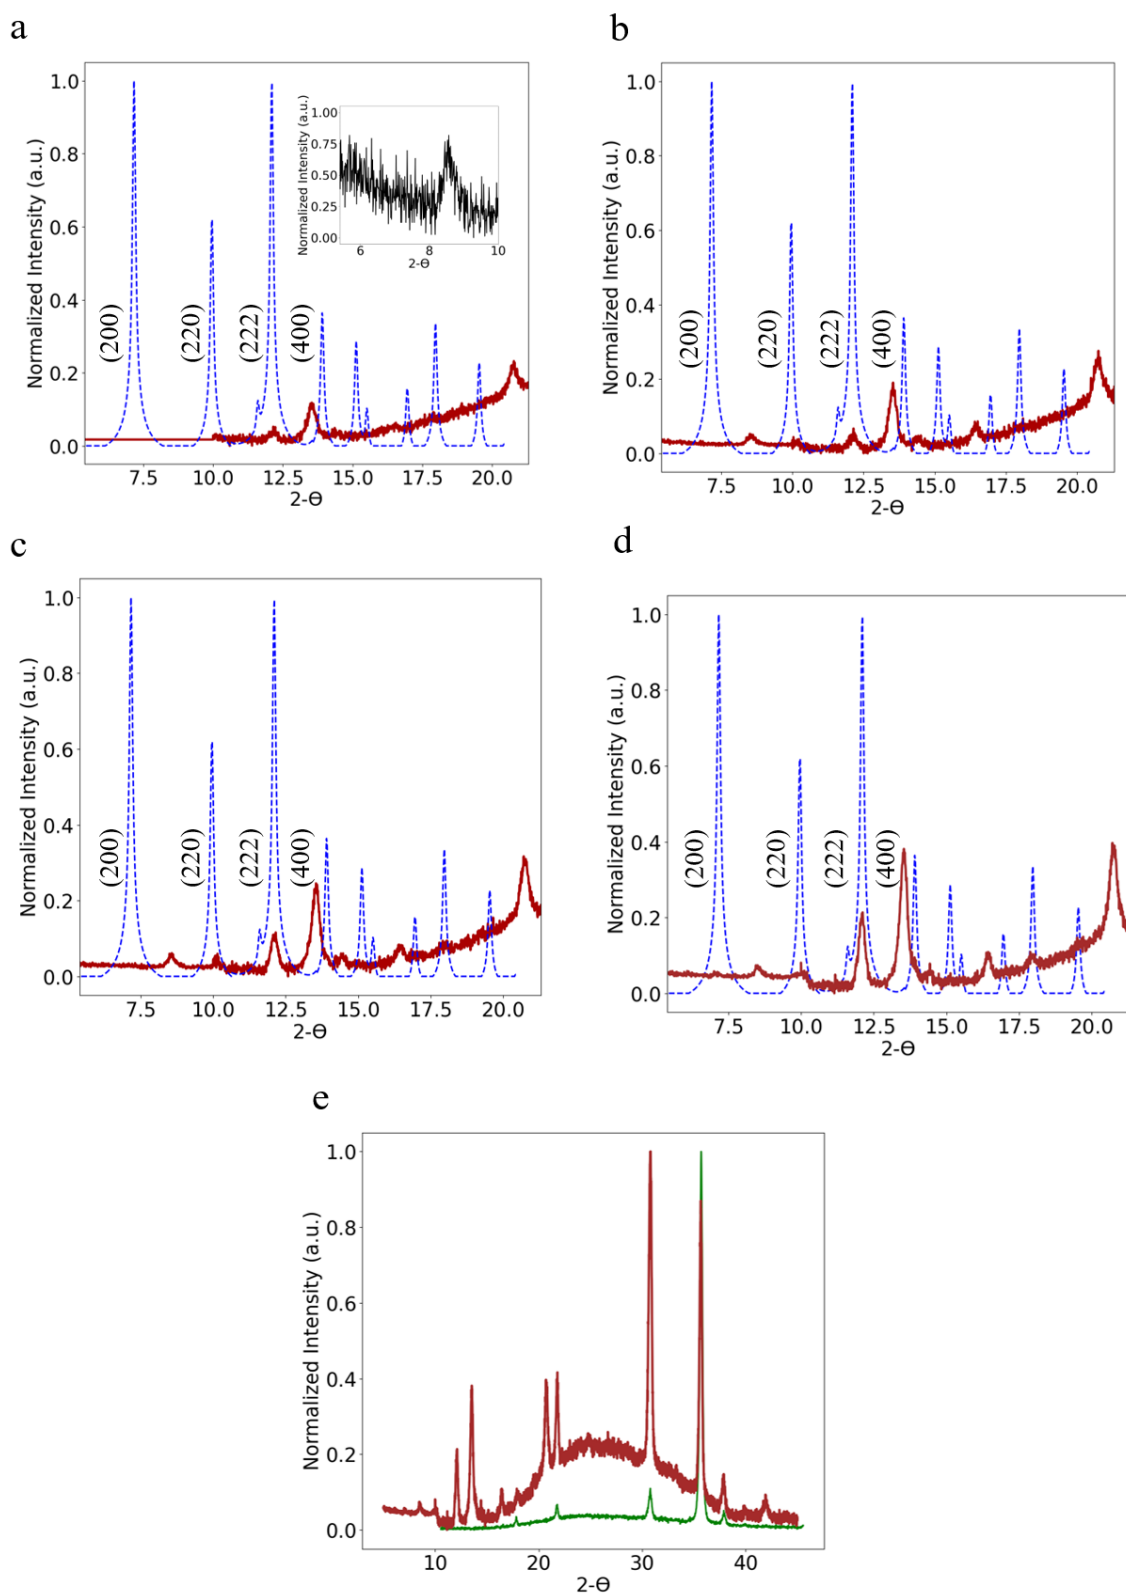

**Figure S1.** PXRD pattern of the HKUST-1 thin films (red curve) obtained on ITO (green curve in (e)) by different spin-coating cycles: a) 100 cycles, b) 200 cycles, c) 300 cycles, and d) 500 cycles. Model HKUST-1 is also represented (blue dotted curve, CCDC: 2091260). The HKUST-1 thin films revealed strong reflection peak at (400) plane, next to weaker reflection at (220) and (222) planes, corresponding to the preferential orientation of HKUST-1 during the growth.

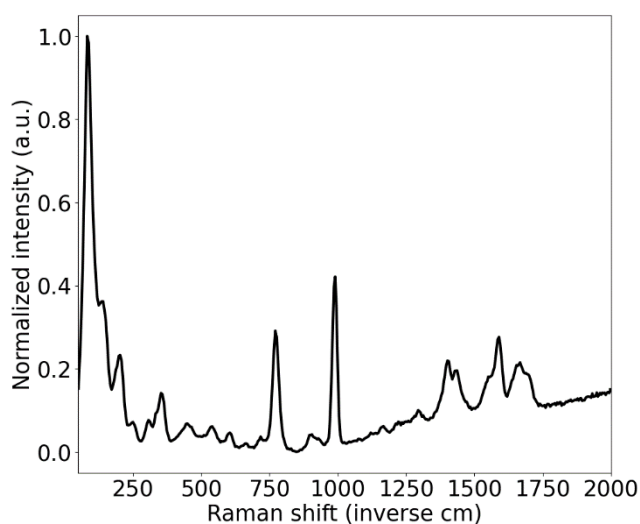

**Figure S2.** Raman spectra of the HKUST-1 thin film (150 nm thick).

**Table S1.** Interpretation of chemical bonds from Raman spectra of HKUST-1 thin film with the thickness of 150 nm.

| Peak position, $\text{cm}^{-1}$ | Peak assignment      | Ref. |
|---------------------------------|----------------------|------|
| 173                             | $\nu(\text{Cu-Cu})$  | [13] |
| 266                             | $\nu(\text{Cu-Ow})$  |      |
| 495                             | $\nu(\text{Cu-O})$   |      |
| 730,814                         | $\gamma(\text{C-H})$ |      |
| 929                             | $\nu(\text{C-C})$    |      |
| 997,1610                        | $\nu(\text{C=C})$    |      |
| 1430,1580                       | $\nu(\text{COO})$    |      |

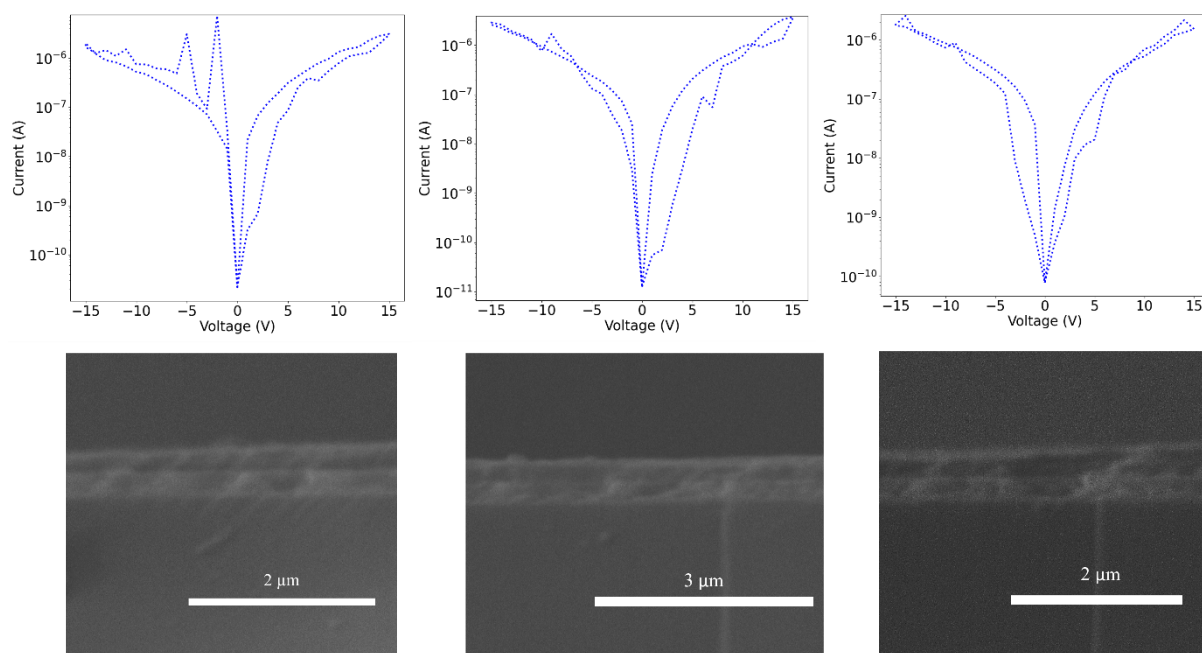

**Figure S3.** Current-voltage curves (top side) for the ReRAM cells and corresponding SEM cross-section micrographs (bottom side) for 200 spin-coating cycles HKUST-1 thin film.

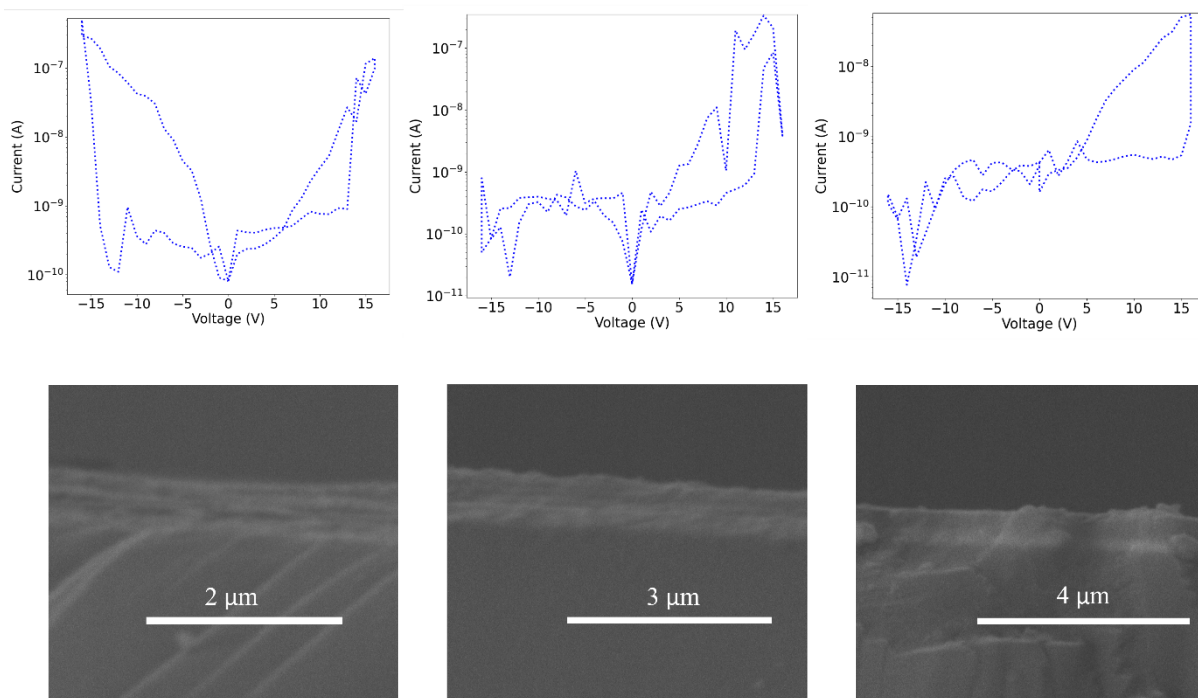

**Figure S4.** Current-voltage curves (top side) for the ReRAM cells and corresponding SEM cross-section micrographs (bottom side) for 300 spin-coating cycles HKUST-1 thin film.

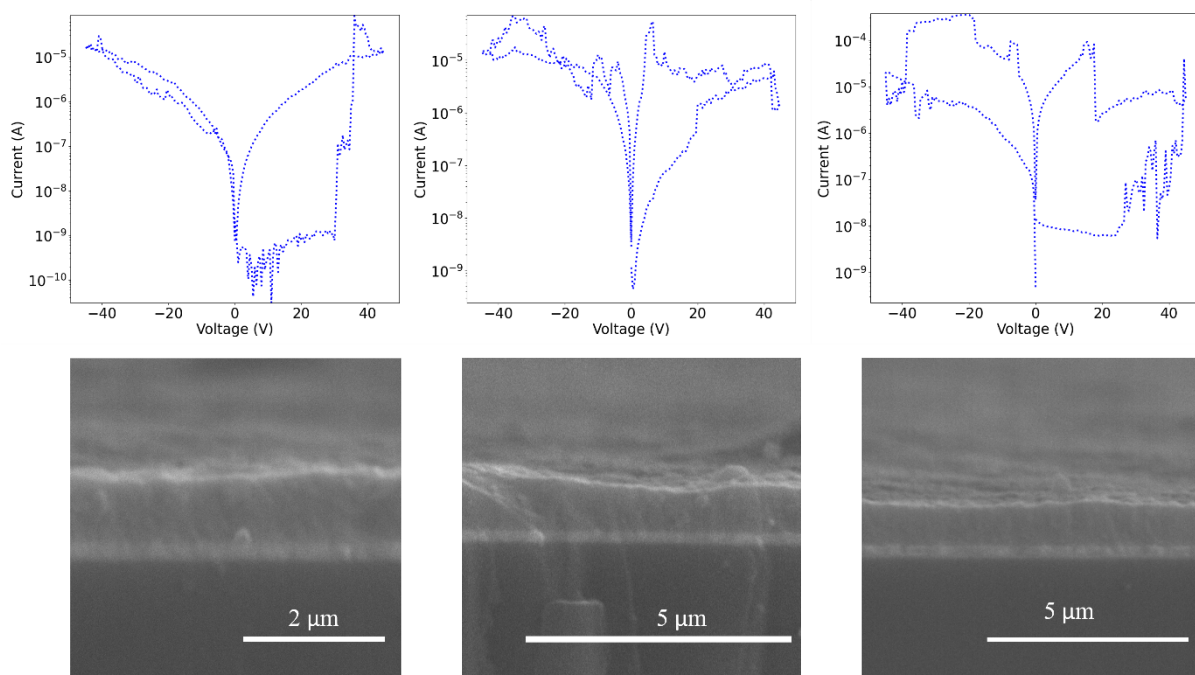

**Figure S5.** Current-voltage curves (top side) for the ReRAM cells and corresponding SEM cross-section micrographs (bottom side) for 500 spin-coating cycles HKUST-1 thin film.

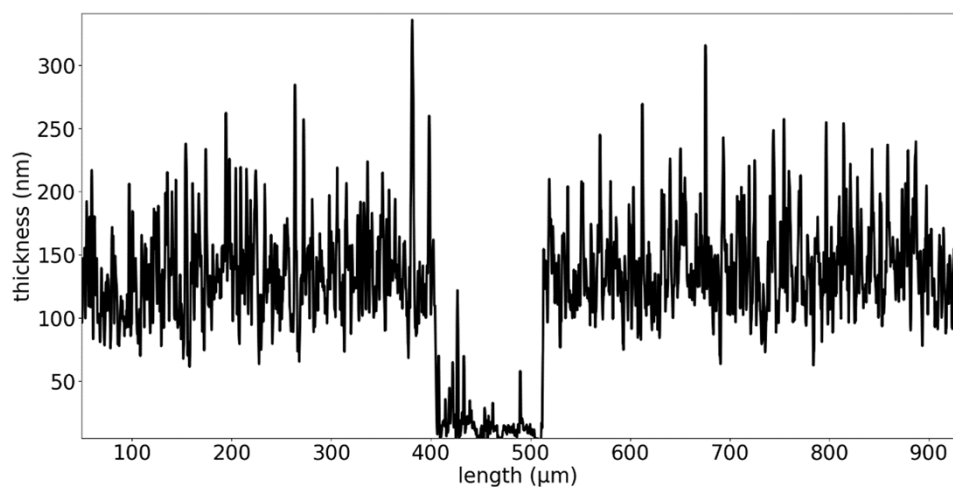

**Figure S6.** Ellipsometry of 100 spin-coating cycles HKUST-1 thin film.

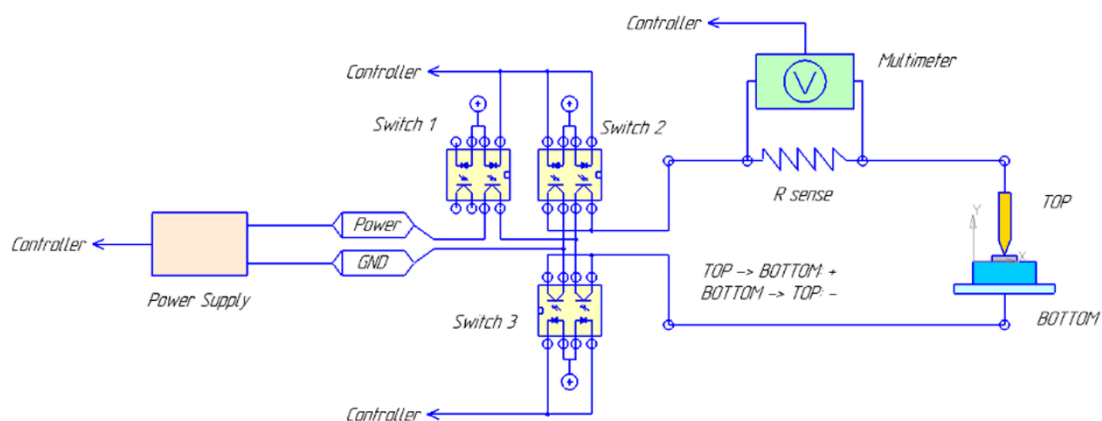

**Figure S7.** Electrical scheme for current-voltage measurements.

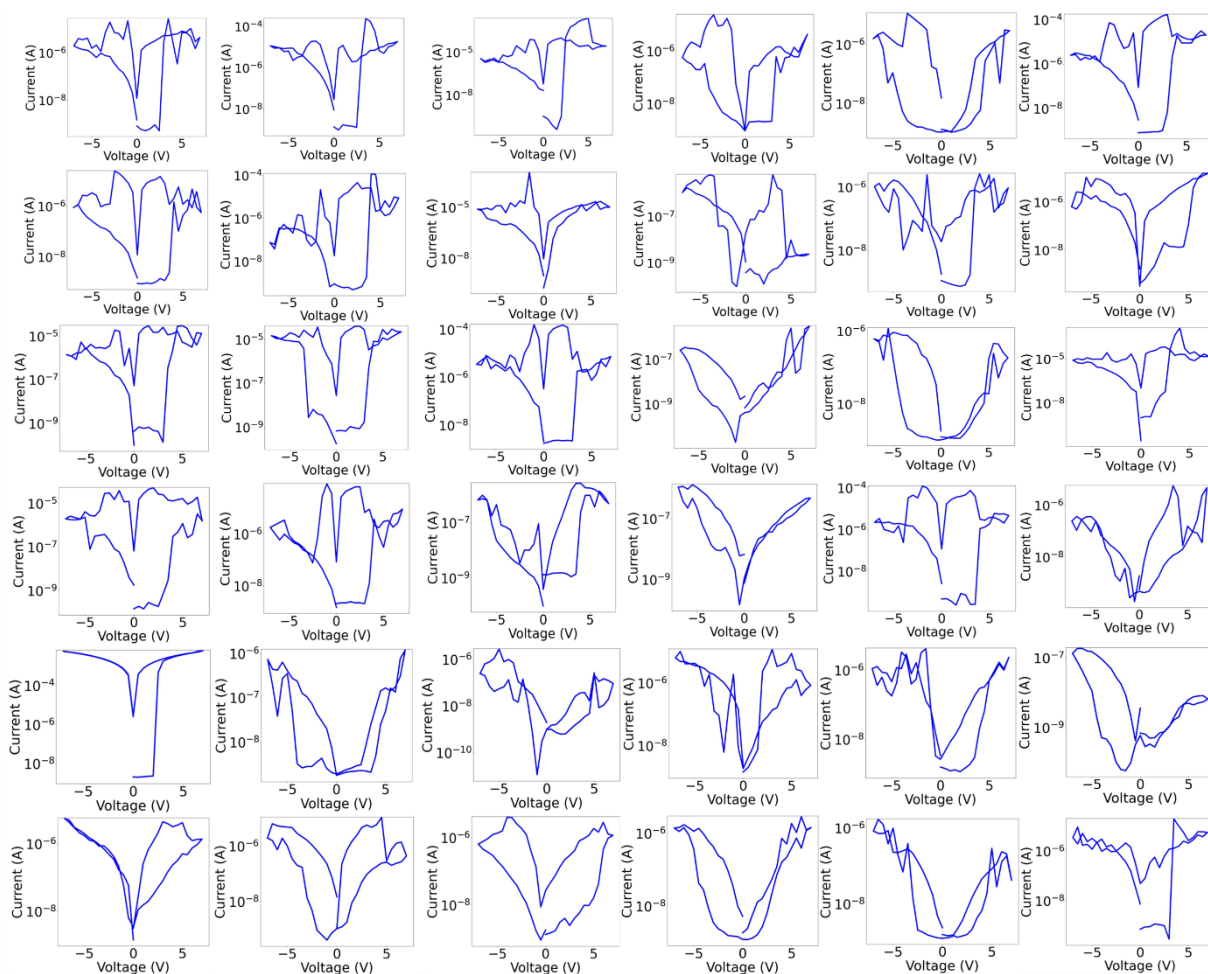

**Figure S8.** The set of current-voltage curves for 6x6 ReRAM cells of the prototype from Figure 1a.

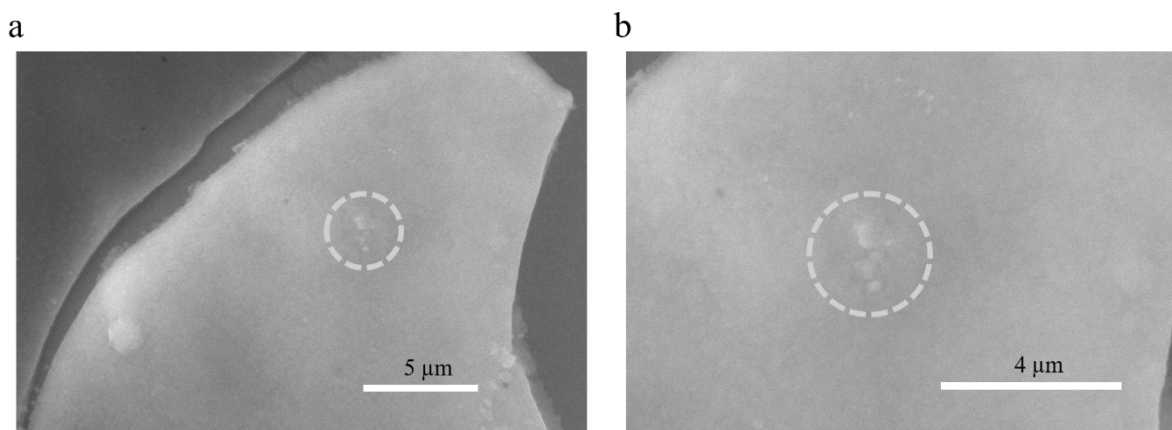

**Figure S9.** (a,b) SEM micrographs of the HKUST-1 film surface area where the stability of memristive behavior (in 50 set/reset cycles) was studied.

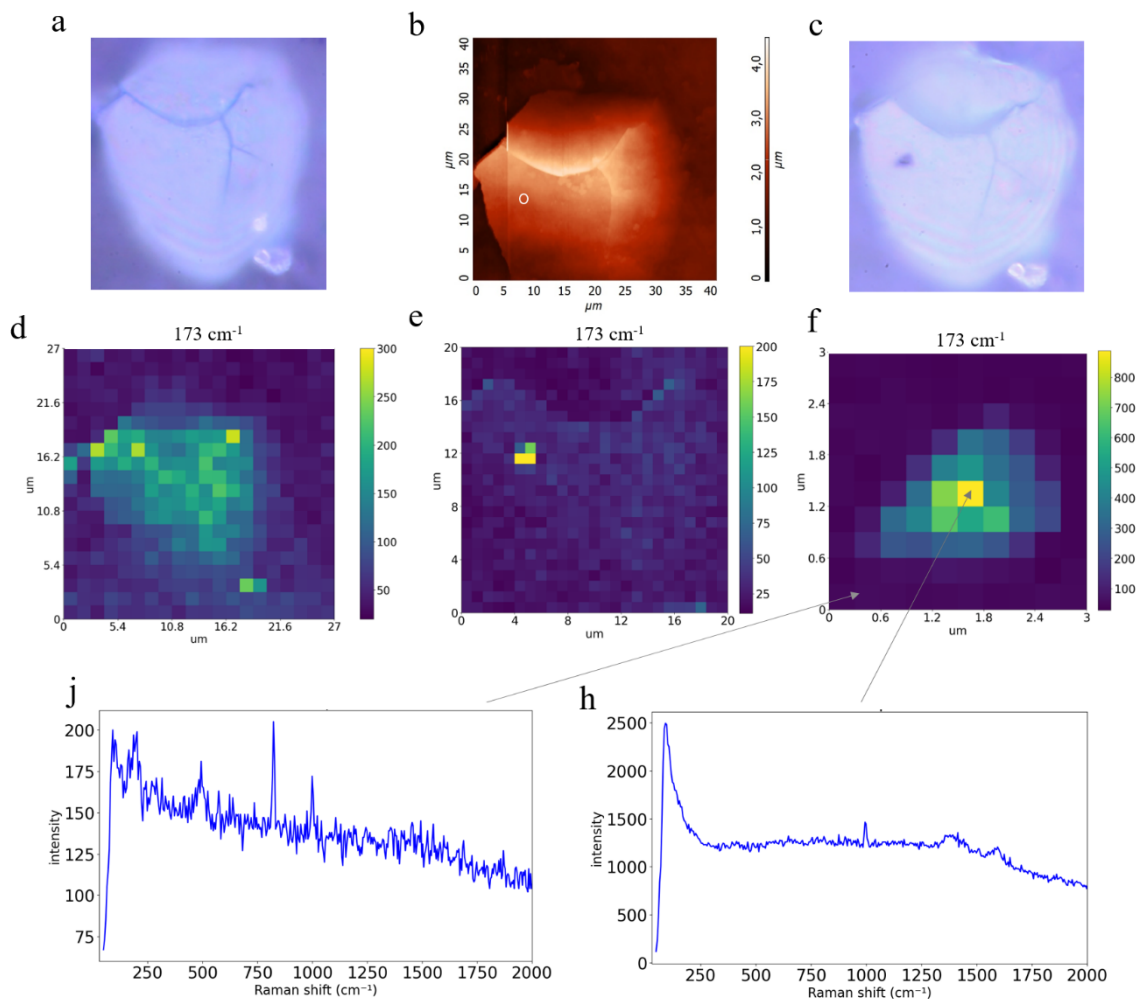

**Figure S10.** (a) Optical image of the HKUST-1 film surface area before the applied voltage. (b) Atomic force microscopy image of the same area (circled) before the applied voltage. (c) Optical image of the HKUST-1 film surface area after the applied voltage (4 V). (d) Raman spectroscopy map of the intensity distribution of the  $\nu(\text{Cu-Cu})$  bond ( $173\text{ cm}^{-1}$ ) of the HKUST-1 film surface area before the applied voltage. (e,f) Raman spectroscopy map of the intensity distribution of the  $\nu(\text{Cu-Cu})$  bond of the HKUST-1 film surface area after the applied voltage (4 V). (g) Raman spectra over different areas of the HKUST-1 film after the applied voltage.

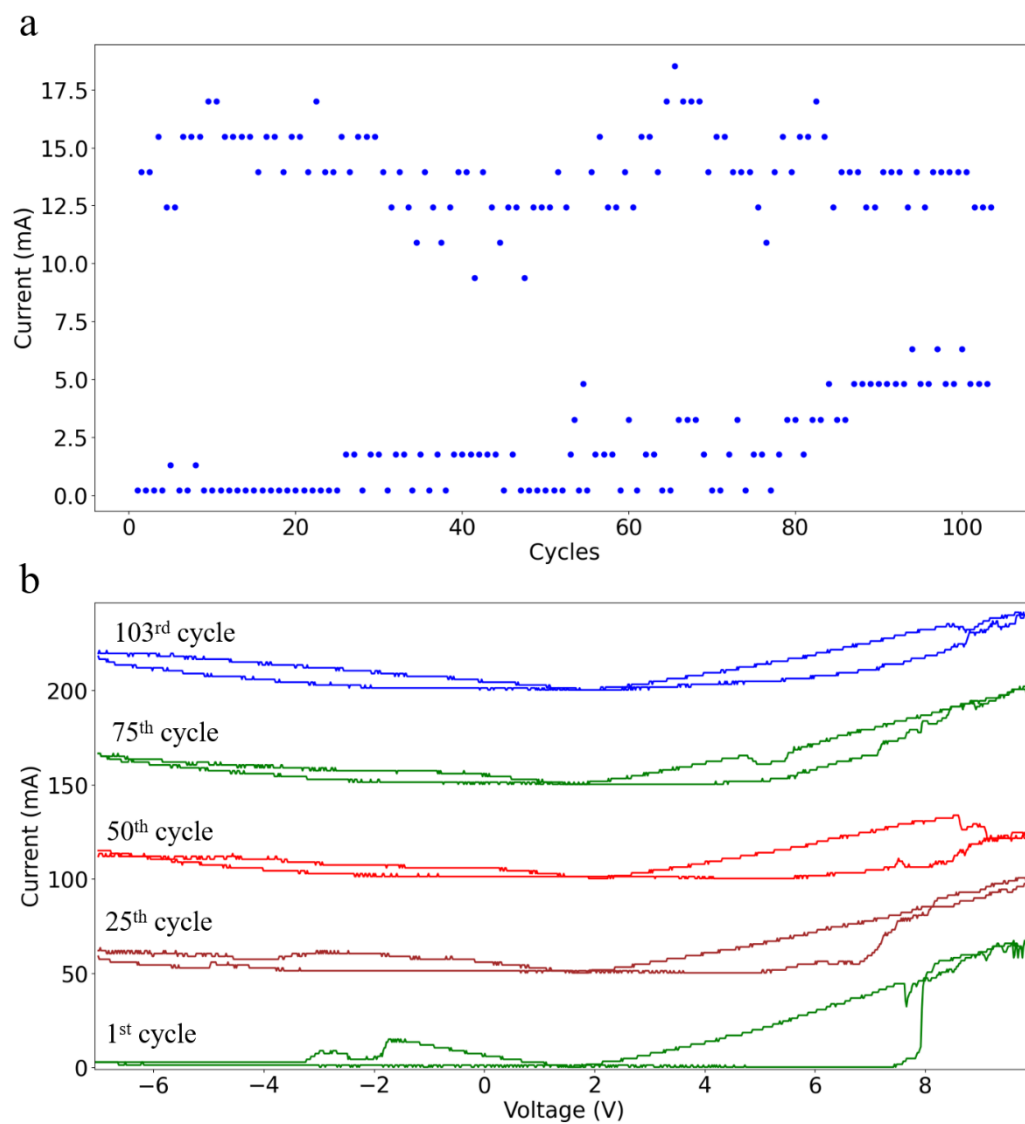

**Figure S11.** (a) Endurance (set/reset cycles) of the HKUST-1 film, analyzed by the current atomic force microscopy (reading voltage was 4 V). (b) Volt-Ampere characteristic curves.



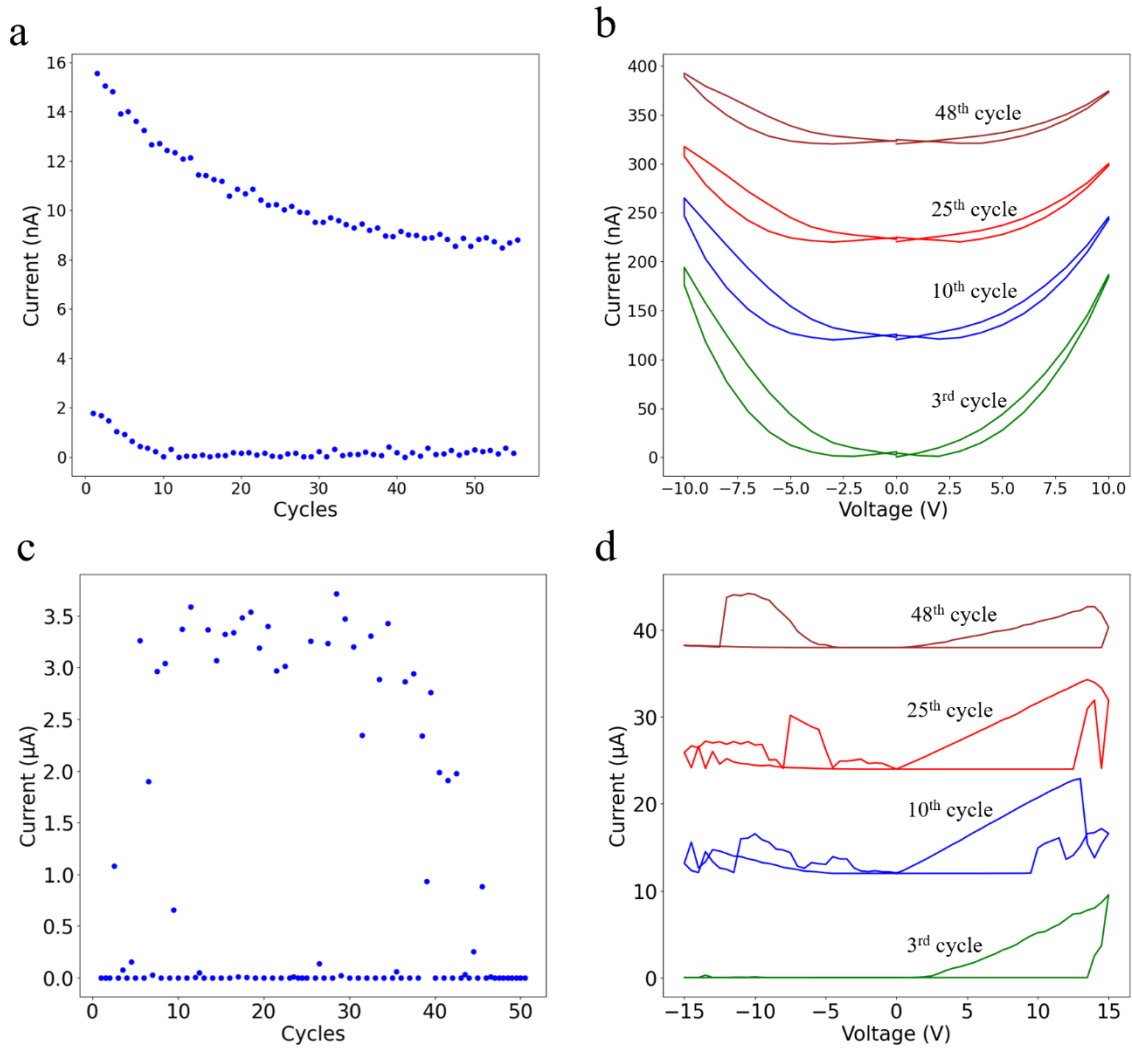

**Figure S12.** Comparison of the endurance for the same ReRAM cell after 2 years of storage under normal conditions. (a,b) Initial cell, and (c,d) the cell after 2 years of storage.

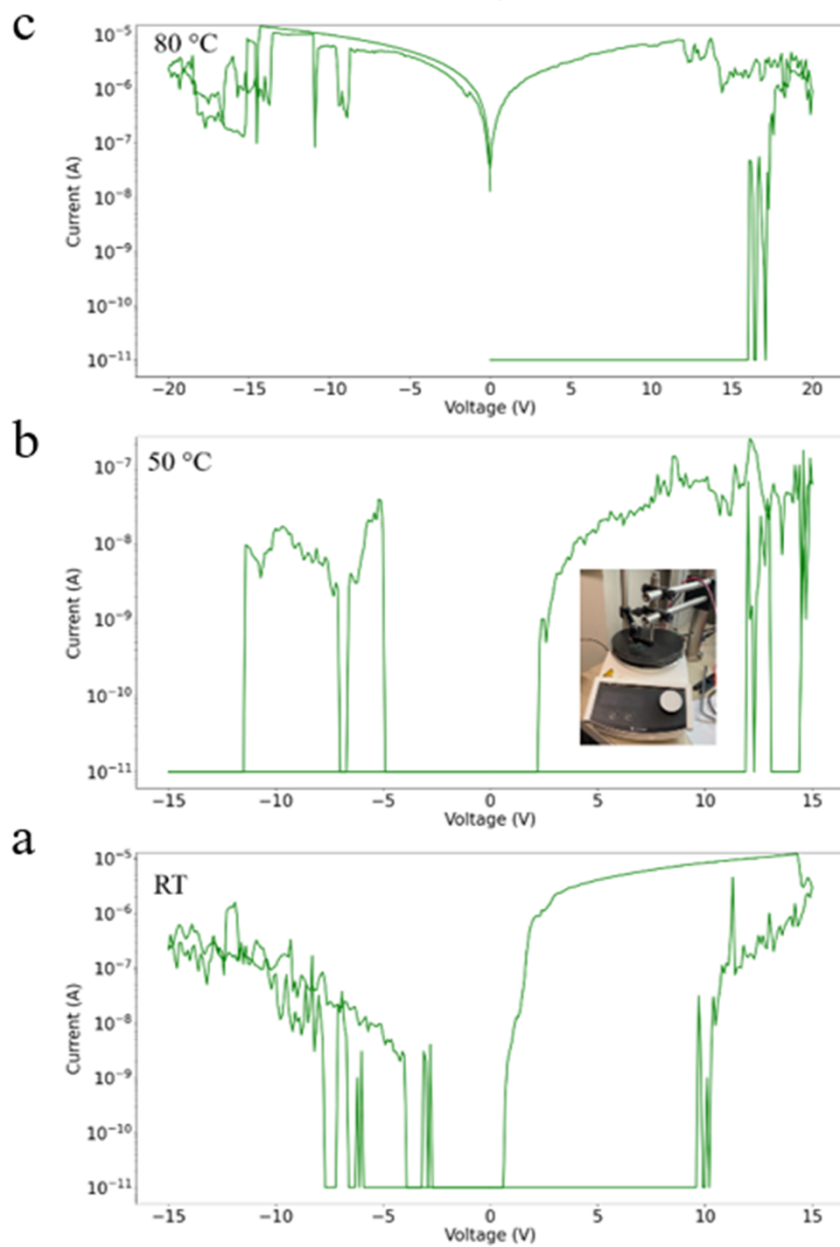

**Figure S13.** An effect of heat on the operation parameters of ReRAM cell, measured at room temperature (a), at 50 °C (b), and 80 °C (c).

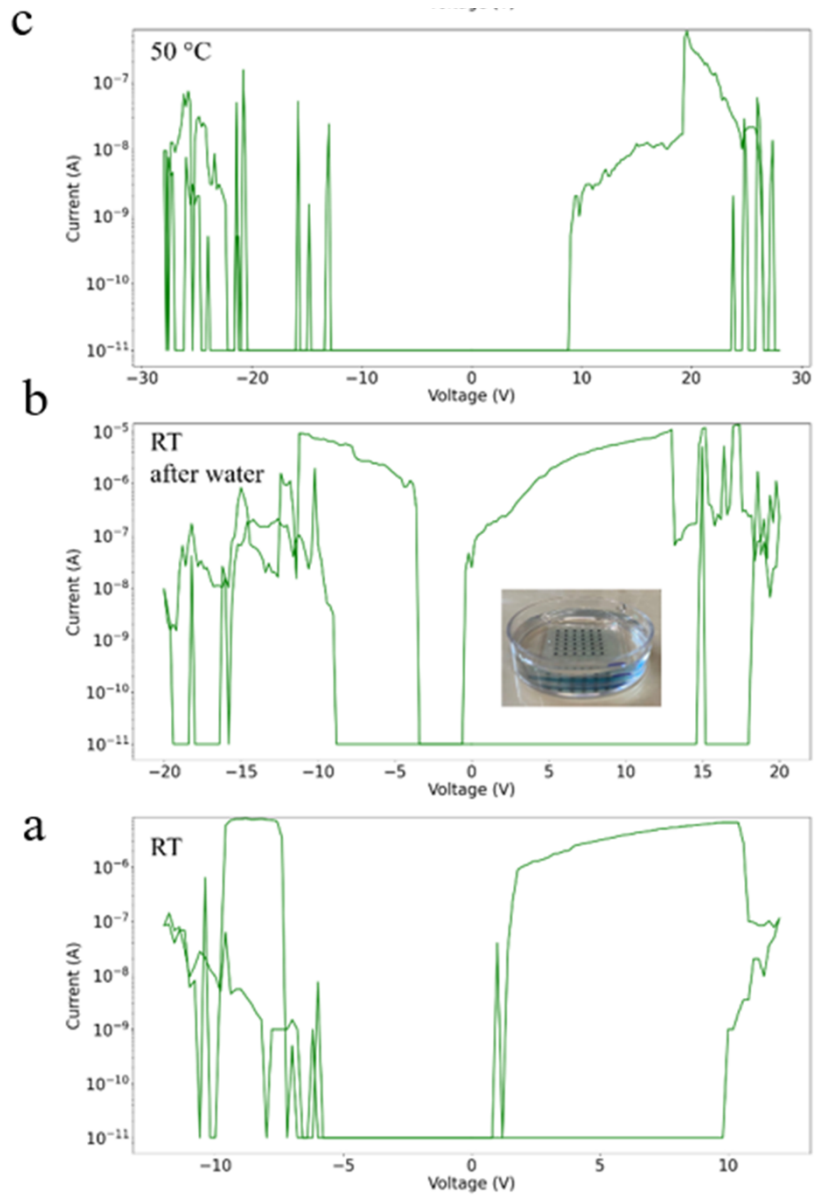

**Figure S14.** An effect of heat and water on the operation parameters of the ReRAM cell, measured at room temperature (a), after immersion in water for 1 min and drying at room temperature (b), and after heating the same cell up to 50 °C (c).

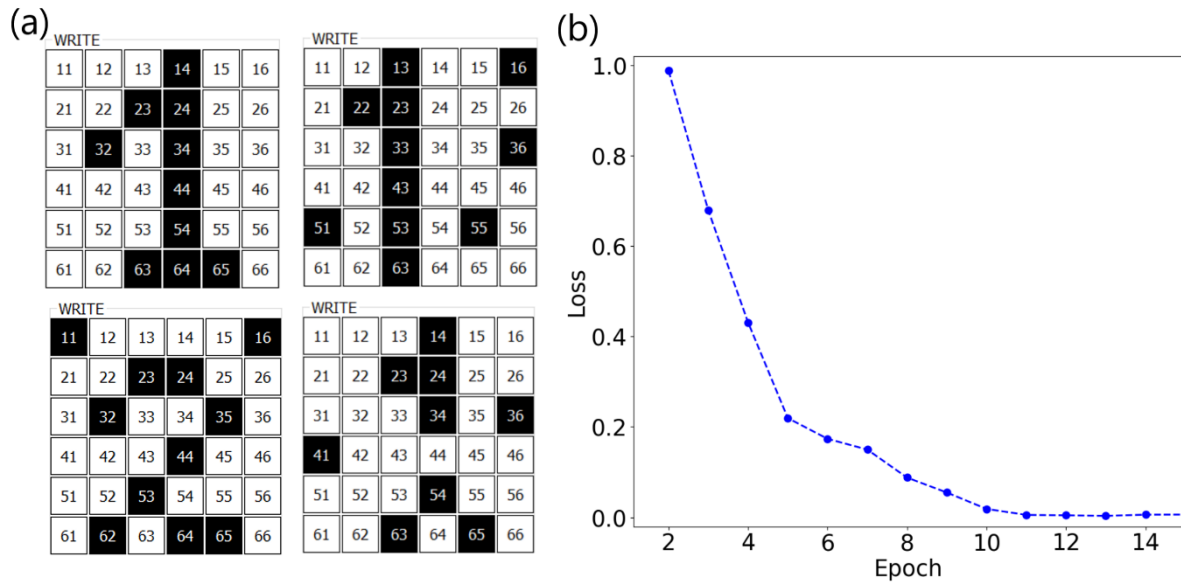

**Figure S15.** (a) Different results of reading from our prototype. (b) Error compensation for reading the information via neural network.

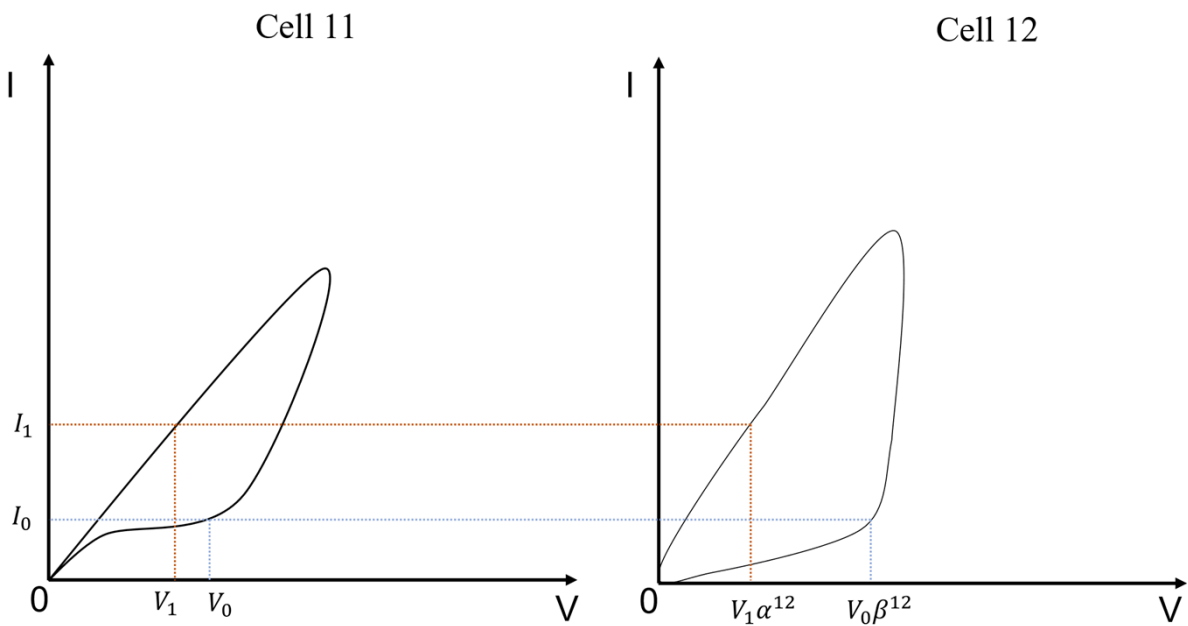

**Figure S16.** The schematic current-voltage curves (see Figure S8) for different ReRAM cells (11 and 12), allowing one to determine the coefficients ( $\alpha^{12}$ ,  $\beta^{12}$ ) at a specific applied voltage  $V_1$  and  $V_0$ .

**Table S2.** Correspondence of the resulting current to the numerical result (in Figure 3c).

| Number, $N$ | Current ( $\mu\text{A}$ ) |
|-------------|---------------------------|
| 0           | 7.876327                  |
| 1           | 13.485707                 |
| 2           | 19.095087                 |
| 3           | 24.704467                 |

|    |            |
|----|------------|
| 4  | 30.313846  |
| 5  | 35.923226  |
| 6  | 41.532606  |
| 7  | 47.141986  |
| 8  | 52.751365  |
| 9  | 58.360745  |
| 10 | 63.970125  |
| 11 | 69.579505  |
| 12 | 75.188884  |
| 13 | 80.798264  |
| 14 | 86.407644  |
| 15 | 92.017024  |
| 16 | 97.626403  |
| 17 | 103.235783 |
| 18 | 108.845163 |
| 19 | 114.454543 |
| 20 | 120.063922 |
| 21 | 125.673302 |
| 22 | 131.282682 |
| 23 | 136.892062 |
| 24 | 142.501441 |
| 25 | 148.110821 |
| 26 | 153.720201 |
| 27 | 159.329581 |
| 28 | 164.93896  |
| 29 | 170.54834  |
| 30 | 176.15772  |

**Symbol encryption** (via ASCII strategy):

M —ASCII→ 77 → [(77 \* 0.974)] → 75 —ASCII→ K  
O —ASCII→ 79 → [(79 \* 0.517)] → 41 —ASCII→ )  
F —ASCII→ 70 → [(70 \* 0.899)] → 63 —ASCII→ ?

To decrypt, we perform the reverse process:

K —ASCII→ 75 → [(75 / 0.974)] → 77 —(ASCII)→ M  
) —ASCII→ 41 → [(41 / 0.517)] → 79 —(ASCII)→ O  
? —ASCII→ 63 → [(63 / 0.899)] → 70 —(ASCII)→ F
